# Supplementary material
Source: PubMed Central journal article supplement (PMC4175993)
Supplement: NIHMS579531-supplement-Supp_Table_S1-S3.pdf [file NIHMS579531-supplement-Supp_Table_S1-S3.pdf]

**Table S1.** ICD-9 codes for pre-existing medical conditions, medical events, and obstetric complications utilized to identify cases in the NIS 2000 – 2009.

| Medical Condition                                                            | ICD-9 codes                                                            |
|------------------------------------------------------------------------------|------------------------------------------------------------------------|
| <b>Cardiomyopathy</b>                                                        |                                                                        |
| Peripartum cardiomyopathy                                                    | 674.5x                                                                 |
| Cardiomyopathy secondary to primary causes                                   | 425.x                                                                  |
| <b>Heart Disease</b>                                                         |                                                                        |
| Heart valve disease                                                          | 394-397, 424, 785.2, 785.3, V42.2                                      |
| Congenital heart disease                                                     | 745-747, 648.5                                                         |
| Chronic myocarditis                                                          | 032.82, 074.20, 074.23, 036.40, 036.43, 093.82, 130.3, 393, 398.0, 429 |
| Conduction disorders and dysrhythmias                                        | 426.0-426.9, 427.0-427.4, 427.6-427.9, 785.0, 785.1, V45.0, V53.3      |
| History of ischemic heart disease                                            | 412, 414                                                               |
| <b>Pulmonary Disease</b>                                                     |                                                                        |
| Pulmonary circulation                                                        | 416, 417                                                               |
| Asthma                                                                       | 493.x                                                                  |
| <b>Endocrine</b>                                                             |                                                                        |
| Diabetes (non-gestational)                                                   | 249.x, 250.x, 648.0x                                                   |
| Thyroid disease                                                              | 240.x-246.x, 648.1x                                                    |
| <b>Autoimmune</b>                                                            |                                                                        |
| Systemic lupus                                                               | 710.0, 695.4, 583.8                                                    |
| Rheumatoid arthritis/ collagen disease                                       | 701.0, 710, 710.1x-710.9x, 714.x, 720.x, 725                           |
| Human immune deficiency                                                      | 042                                                                    |
| <b>Hematologic</b>                                                           |                                                                        |
| Thrombophilia (includes history of thrombosis and antiphospholipid syndrome) | 273.8, 286.53, 286.9, 289.81, 289.82, V12.51                           |
| Sickle cell disease/Thalassemia                                              | 282.4x, 282.6x                                                         |

|                                  |                                                                                   |
|----------------------------------|-----------------------------------------------------------------------------------|
| Anemia                           | 648.2x, 280.x, 285.x                                                              |
| Thrombocytopenia                 | 287.3x, 287.4x, 287.5x                                                            |
| <b>Acquired</b>                  |                                                                                   |
| Drug use                         | 292.x, 304.x, 305.2x-305.9x, 655.5x, 760.70, 760.72-760.75, 779.5, 965.0x, V65.42 |
| Alcohol use                      | 291.x, 303.x, 305.0x, 760.71, 980.0x                                              |
| Smoking                          | 305.1, V15.82, 649.0x                                                             |
| <b>Chronic Hypertension</b>      | 401.x-405.x, 437.2, 642.0x-642.2x                                                 |
| <b>Chronic Renal Failure</b>     | 585.x, 792.5, V42.0, V45.1, V56.x                                                 |
|                                  |                                                                                   |
| <b>Event or Condition</b>        |                                                                                   |
| <b>Cardiac Event</b>             |                                                                                   |
| Acute myocarditis                | 391.2, 422.x                                                                      |
| Myocardial infarction            | 410.x, 411.x                                                                      |
| Ventricular fibrillation         | 427.4X                                                                            |
| Cardiac arrest                   | 427.5                                                                             |
| Acute heart failure              | 428.x                                                                             |
| Endocarditis                     | 421.x                                                                             |
| Angina                           | 413.x                                                                             |
| <b>Pulmonary Event</b>           |                                                                                   |
| Pneumonia                        | 480.x-486.x, 487.0                                                                |
| Respiratory distress syndrome    | 518.5                                                                             |
| Pulmonary edema                  | 518.4                                                                             |
| Bronchitis                       | 490, 491.x                                                                        |
| <b>Thromboembolic Event</b>      |                                                                                   |
| Stroke/cerebrovascular disorders | 325, 430, 431, 432.x, 433.x, 434.x, 436, 437.x, 671.5x, 674.0x, 997.2, 999.2      |
| Pulmonary embolism               | 415.1x, 673.x                                                                     |
| Systemic embolism                | 444.x                                                                             |

|                                                     |                                |
|-----------------------------------------------------|--------------------------------|
| Deep venous thrombosis                              | 451.1x, 451.2x, 671.3x, 671.4x |
| <b>Infections</b>                                   |                                |
| Sepsis                                              | 038.x, 790.7                   |
| Postpartum bacterial infection                      | 590.1, 646.5x, 646.6x, 615.0   |
| Influenza                                           | 487.x-488.x                    |
| Group B streptococcus                               | V02.51                         |
| <b>Renal Event</b>                                  |                                |
| Acute renal failure                                 | 584.x, 639.3x, 669.3x          |
| <b>Complication of Pregnancy</b>                    |                                |
| Gestational diabetes                                | 648.8x                         |
| Preeclampsia, eclampsia or gestational hypertension | 642.3x-642.7x                  |
| Multiple Gestation                                  | 651.x, 652.6x, V27.2-V27.7     |
| <b>Obstetric Complications</b>                      |                                |
| Preterm labor                                       | 644.x                          |
| Abruption                                           | 641.2x                         |
| Fetal growth restriction                            | 656.5x                         |
| Intrauterine fetal death                            | 656.4x                         |
|                                                     |                                |

**Table S2.** Trends in pre-existing medical and obstetric conditions at a delivery admission during the years 2000 – 2009 by linear regression (significance defined as P-value < 0.01). See Figure 1 and Figure S1 for graphical representation.

| Condition                          | <sup>a</sup> Slope | R <sup>2</sup> | P-value |
|------------------------------------|--------------------|----------------|---------|
| Cardiomyopathy                     | 0.021              | 0.90           | <0.001  |
| Congenital heart disease           | 0.038              | 0.83           | <0.001  |
| Valvular heart disease             | -0.400             | 0.80           | <0.001  |
| Conduction disorders               | 0.422              | 0.99           | <0.001  |
| History of ischemic heart disease  | 0.011              | 0.78           | <0.001  |
| Asthma                             | 2.123              | 0.97           | <0.001  |
| Disorders of pulmonary circulation | 0.015              | 0.97           | <0.001  |
| Diabetes                           | 0.343              | 0.84           | <0.001  |
| Thyroid disorders                  | 1.214              | 0.98           | <0.001  |
| Systemic lupus erythematosus (SLE) | 0.039              | 0.79           | <0.001  |
| Rheumatoid arthritis               | 0.077              | 0.96           | <0.001  |
| Thrombophilia                      | 0.512              | 0.97           | <0.001  |
| Thrombocytopenia                   | 0.428              | 0.83           | <0.001  |
| Anemia                             | 4.508              | 0.91           | <0.001  |
| Chronic hypertension               | 1.053              | 0.99           | <0.001  |
| Chronic renal failure              | 0.040              | 0.95           | <0.001  |
| Tobacco use                        | 4.574              | 0.99           | <0.001  |
| Drug use                           | 0.618              | 0.79           | <0.001  |
| Alcohol use                        | -0.001             | 0.001          | 0.95    |
| Gestational diabetes               | 2.177              | 0.93           | <0.001  |
| Preeclampsia                       | 1.159              | 0.90           | <0.001  |
| Multiple gestation                 | 0.227              | 0.54           | 0.016   |
| Fetal growth restriction           | 0.693              | 0.99           | <0.001  |
| Placental abruption                | -0.029             | 0.05           | 0.44    |
| Fetal death                        | -0.052             | 0.87           | <0.001  |

<sup>a</sup> Slope ( $\Delta y/\Delta x$ ) reported is the change in the listed condition per 1000 deliveries ( $\Delta y$ ) per year ( $\Delta x$ )

**Table S3.** Trends in medical events at a delivery admission during the years 2000 – 2009 by linear regression (significance defined as P-value < 0.01). See Figure S2 for graphical representation.

| Condition                           | <sup>a</sup> Slope | R <sup>2</sup> | P-value |
|-------------------------------------|--------------------|----------------|---------|
| Myocardial infarction               | 0.001              | 0.27           | 0.121   |
| Ventricular fibrillation            | -0.0002            | 0.07           | 0.61    |
| Cardiac arrest                      | 0.002              | 0.52           | 0.018   |
| Acute heart failure                 | 0.008              | 0.33           | 0.084   |
| Pneumonia                           | 0.020              | 0.30           | 0.103   |
| Respiratory distress syndrome (RDS) | 0.010              | 0.91           | <0.001  |
| Pulmonary edema                     | -0.009             | 0.72           | 0.002   |
| Stroke/CVA                          | -0.001             | 0.07           | 0.63    |
| Pulmonary embolism                  | 0.009              | 0.63           | 0.006   |
| Deep vein thrombosis (DVT)          | -0.004             | 0.04           | 0.33    |
| Sepsis                              | 0.016              | 0.76           | <0.001  |
| Influenza                           | 0.027              | 0.29           | 0.110   |
| Postpartum bacterial infection      | -1.483             | 0.84           | <0.001  |
| Acute renal failure                 | 0.034              | 0.95           | <0.001  |

<sup>a</sup>. Slope ( $\Delta y/\Delta x$ ) reported is the change in the listed condition per 1000 deliveries ( $\Delta y$ ) per year ( $\Delta x$ )
